# Supplementary material for: A Transcriptomic Analysis of Higher-Order Ecological Interactions in a Eukaryotic Model Microbial Ecosystem
Source: PubMed Central journal article supplement (PMC9769528; doi:10.1128/msphere.00436-22), 2022-10-19

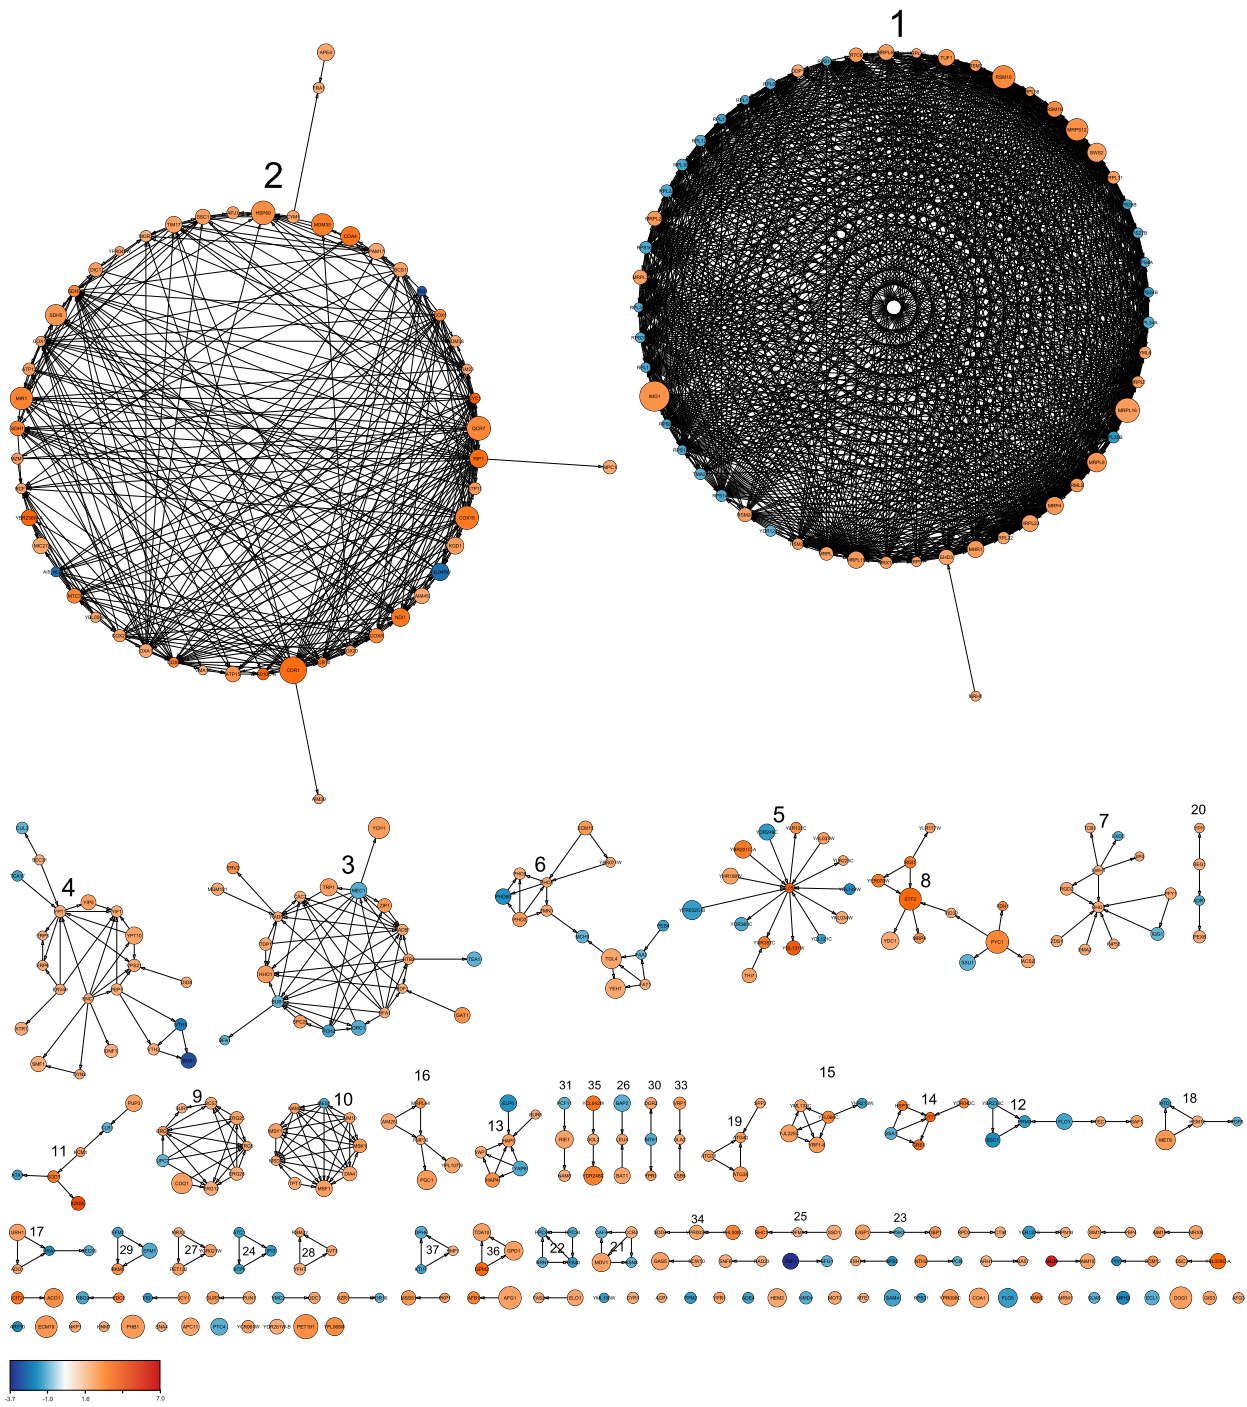

Supplement: msphere.00436-22-s0010.pdf [file msphere.00436-22-s0010.pdf]
